# Supplementary material for: A multi-instrumental approach for calibrating two real-time mass spectrometers using high performance liquid chromatography and positive matrix factorization
Source: Copernicus journal article supplement (doi:10.5194/ar-2023-21), 2024-01-04
Supplement: Supplementary file 1 [file ar-2023-21-supplement.pdf]

1 **Supporting information for:**

2 **“A multi-instrumental approach for calibrating two real-time**  
3 **mass spectrometers using high performance liquid**  
4 **chromatography and positive matrix factorization”**

5 Melinda K. Schueneman<sup>1</sup>, Douglas A. Day<sup>1</sup>, Dongwook Kim<sup>1</sup>, Pedro Campuzano-Jost<sup>1</sup>, Seonsik  
6 Yun<sup>1</sup>, Marla P. DeVault<sup>1</sup>, Anna C. Ziola<sup>1</sup>, Paul J. Ziemann<sup>1</sup>, and Jose L. Jimenez<sup>1</sup>

7 <sup>1</sup>Department of Chemistry and Cooperative Institute for Research in Environmental Sciences, University of  
8 Colorado, Boulder, CO 80309, USA

9

10 **S1 General system information for multi-instrumental calibration method**

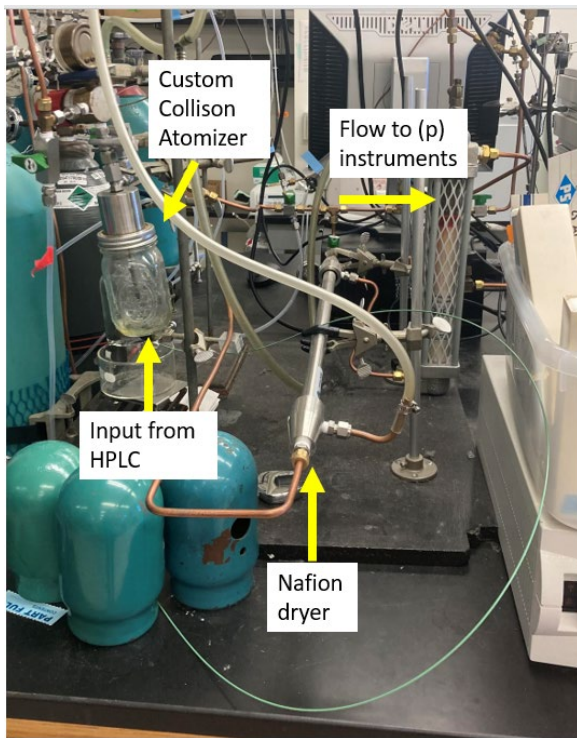

11

12 **Figure S1. HPLC tubing into custom atomizer**

13

14 **Table S1. Tube volumes, flows, and residence times from HPLC separation to particle instrument detection.**

| Item                                                                               | Total volume (mL) | Flow rate (flow through) | Residence time |
|------------------------------------------------------------------------------------|-------------------|--------------------------|----------------|
| Tubing transferring liquid from after HPLC column and UV-Vis detection to atomizer | 0.67              | 1.0 mL min <sup>-1</sup> | 40 s           |
| Atomizer                                                                           | 500               | 8-10 l min <sup>-1</sup> | 3-3.75 s       |
| Nafion drier                                                                       | 7.0               | ~ 8 l min <sup>-1</sup>  | 0.053 s        |
| Tubing before manifold                                                             | 118.3             | 7.2 l min <sup>-1</sup>  | 1 s            |
| Post manifold EESI                                                                 | 31.2              | 0.84 l min <sup>-1</sup> | 2.2 s          |
| Post manifold AMS                                                                  | 14.1              | 1.5 l min <sup>-1</sup>  | 0.6 s          |

|                      |      |                          |       |
|----------------------|------|--------------------------|-------|
| Post manifold SMPS A | 34.2 | 1.43 l min <sup>-1</sup> | 1.4 s |
| Post manifold SMPS B | 28.5 | 1.49 l min <sup>-1</sup> | 1.2 s |

15

16

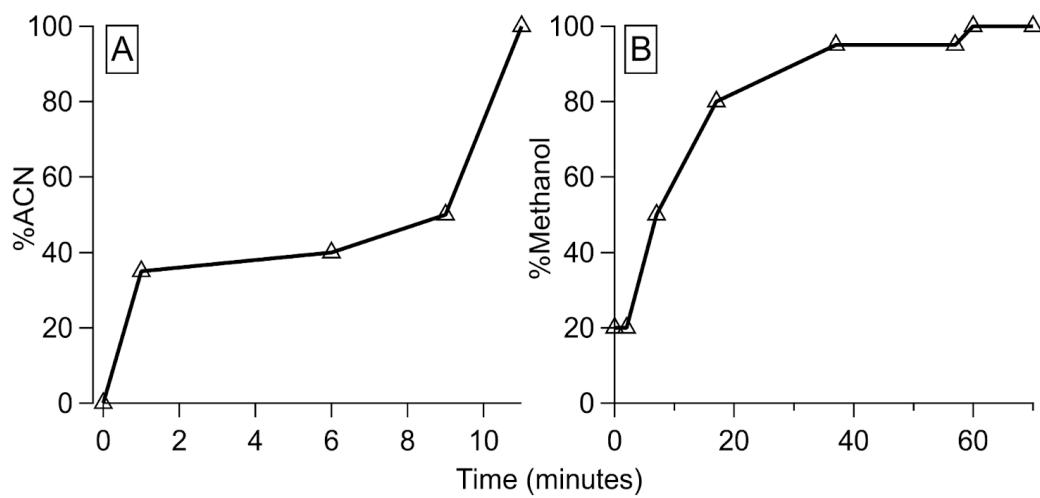

17

18 **Figure S2. Solvent gradients for (A) standard HPLC runs and (B)  $\beta$ -pinene HPLC run. The other solvent was a mixture**  
 19 **of 95% H<sub>2</sub>O/5% ACN.**

20

21 **Table S2. Standard compounds used for HPLC method demonstration, source and purity, volatility (calculated using**  
 22 **published vapor pressures), estimated percent evaporated during transmission (from atomizer output to detection,**  
 23 **calculated with C\* and measured OA concentration at detection), and density (using the ratio of  $d_{va}/d_m$ )**

| Species                | Source + purity                     | Saturation Mass Concentration ( $\mu\text{g m}^{-3}$ ) (T=298 K) | Estimated Percent Evaporated | Density |
|------------------------|-------------------------------------|------------------------------------------------------------------|------------------------------|---------|
| 3-methyl-4-nitrophenol | Aldrich, 98%                        | 5,210                                                            | 92%                          | 1.27**  |
| Phthalic acid          | Beantown Chemical, ACS grade, 99.5% | 5.72                                                             | 0%                           | 1.05    |
| 4-nitrophenol          | Aldrich, 99%                        | 10,600                                                           | 94%                          | 1.48**  |
| Succinic acid          | Aldrich, 99%                        | 1.21                                                             | 0%                           | 1.18    |
| 4-nitrocatechol        | Alfa Aesar, 98%                     | 64                                                               | 63%                          | 1.26    |
| L-malic acid           | Aldrich, 97%                        | 0.24                                                             | -                            | 1.28    |
| Citric acid            | Fisher Scientific                   | 0.18                                                             | -                            | -       |
| Levogluconan           | Chem-Impex Int'l, $\geq 99.0\%$     | 13*                                                              | -                            | 1.30    |
| Acetonitrile           | Fisher Chemical, $>99.95\%$         | -                                                                | -                            | -       |
| Methanol               | Fisher Chemical, $>99.9\%$          | -                                                                | -                            | -       |
| Water                  | VWR Chemicals, HPLC grade           | -                                                                | -                            | -       |
| Ethyl Acetate          | Fisher Chemical, 99.5%              | -                                                                | -                            | -       |

24 \*Reported in (Pagonis et al., 2021)

25 \*\*Density of bulk solution from literature

26 The densities measured using the  $d_{va}/d_m$  ratio do not match the literature values for bulk density well. This is  
 27 potentially due to different phases from that of the bulk material, and/or non-spherical particle shape (Jayne et al.,  
 28 2000; Huffman et al., 2005). Regardless, the  $d_{va}/d_m$  density was used as the best estimate here.

29

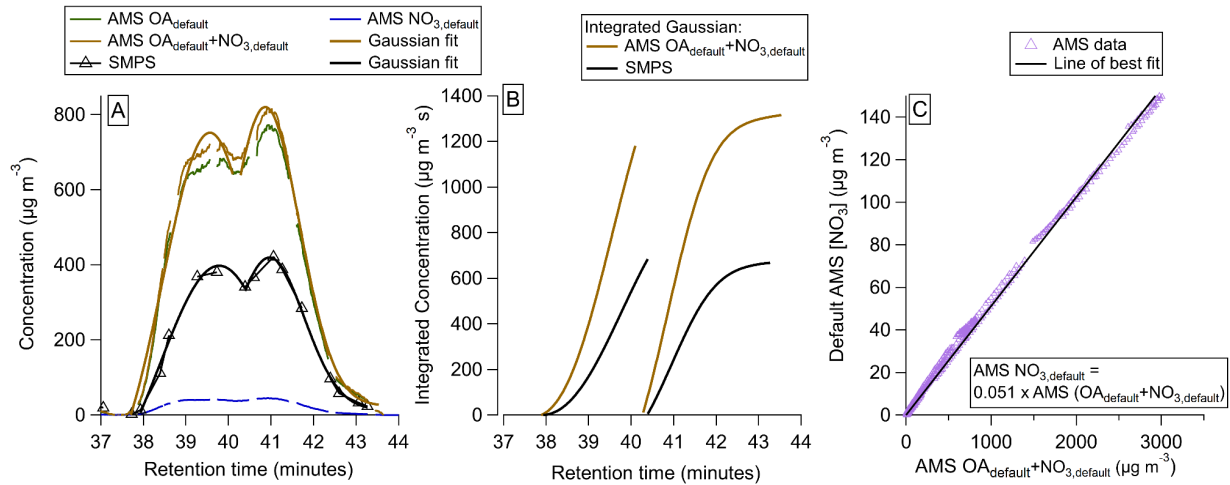

30

31 **Figure S3. (A) AMS default mass concentrations for [OA], [NO<sub>3</sub>], and [OA+NO<sub>3</sub>]; SMPS mass concentrations, corrected**  
 32 **for the average density. (B) Integrated Gaussian curves for each peak. (C) Default AMS [NO<sub>3</sub>] vs total default AMS signal**  
 33 **[OA+NO<sub>3</sub>], fit with a line. The slope (ratio of [NO<sub>3</sub>]/[OA+NO<sub>3</sub>])=0.051.**

34

35 The nitrate contribution to the total mass for this peak was ~5.1%. Fitting the bulk peaks (which are composed of  
 36 multiple eluents) may result in some error in the nitrate contribution approximation.

## 37 S2 SMPS testing and validation

### 38 S2.1 Fast scanning operation and validation

39 The fast scanning operation of the SMPSs was essential here. A “fast scan” here means 30 seconds for voltage  
40 scanning, with 10 seconds retrace time (when the voltage is returned back to 0). This allows for an SMPS data point  
41 to be obtained every 40 seconds, and when two SMPSs are used with interleaved timing, every ~20 seconds. This  
42 faster scanning is not without precedent; one paper published in 1990 first denoted the term “scanning electrical  
43 mobility spectrometer” or SEMS (Wang and Flagan, 1990). In that paper, researchers demonstrated that aerosol  
44 distributions for atmospherically relevant samples could be measured in a 30-second scan time, with a 30-second  
45 retrace time. This research led to the creation of new SMPSs that, like the SEMS, scanned continuously, and thus  
46 would be capable of 30s scanning times. A study a few years later put this to the test, and looked at the impact of  
47 changing SMPS scan times, and found that shorter scan times led to more smearing (less-resolved size distributions)  
48 and lower peak maximas (Russell et al., 1995). They suggest that this is driven by the residence time of the particles  
49 from the output of the DMA to the optical detection by the CPC ( $t_d$ ). In addition, a paper in 2002 elaborated on the  
50 conclusions from Russell et. al. (1995), and found that when scanning with a flow rate of  $0.3 \text{ l min}^{-1}$ , combined with  
51 a 30 seconds scan time, the size distribution was significantly broadened (Collins et al., 2002). The maximum  
52 concentration was decreased by over 50% when compared to a longer scan time (300s), but the integrated  
53 concentration did not seem as affected, due to broadening in the faster scan.

54 Typically, SMPSs are run at longer scan times of two minutes or more (Sioutas, 1999; McMurry, 2000;  
55 Jeong and Evans, 2009). One study modified an SMPS by adding an aerosol particle mass analyzer (APM). With the  
56 modified system, data points were recorded every 60 seconds (Malloy et al., 2009). Another study, which took place  
57 on an aircraft and measured the air over Mexico City, ran their SMPS with a scan time of 1.5 minutes (DeCarlo et  
58 al., 2008). Despite the conclusions of Wang and Flagan (1990), many in the community run their SMPSs as “slow”  
59 (e.g. scan times of two or more minutes) instruments. Henceforth, “slow” will refer to the 2 minute scans, and “fast”  
60 will refer to the 30 second scans.

61 Here, we test each SMPS with a combination of “long” scans (2-minute scans, 15 s retrace,  $3 \text{ l min}^{-1}$  sheath  
62 flow) and “fast” scans (30 s scans, 10 s retrace,  $6 \text{ l min}^{-1}$  sheath flow). In order to assess the usability and accuracy  
63 of the fast scan method, tests were carried out (Fig. S4) to compare the total integrated volume concentration,  
64 number size distributions, and volume size distributions for two-minute scans at both a sample flow of  $0.3 \text{ l min}^{-1}$   
65 and  $1.5 \text{ l min}^{-1}$ , and 30 second scans done with the same flow rates.

66

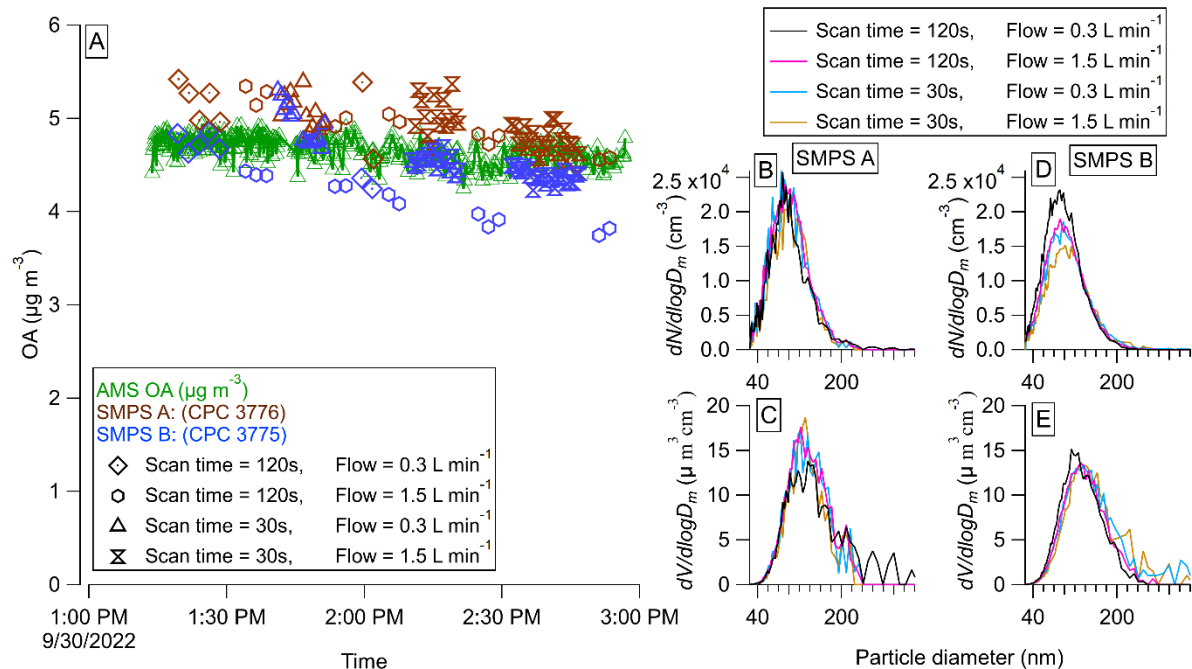

67

68 **Figure S4. (A) Estimated particle mass concentration from SMPS A and B compared to the total OA measured by the**  
 69 **AMS, for different combinations of scanning times and sample flow rates when sampling constant DOS concentrations**  
 70 **from a large chamber. (B) Number distribution comparisons for different combinations of scanning times and flow rates**  
 71 **for SMPS A, (C) Volume distribution comparisons, (D) number distribution comparisons for SMPS B, and (E) volume**  
 72 **distribution comparisons for SMPS B.**

73

74 In Fig. S4a, the total concentration of dioctyl sebacate (DOS) was measured by an AMS (green) and time averaged  
 75 to 10 seconds. The AMS-measured DOS (after AMS calibration for that species) was used as the reference  
 76 concentration. DOS was generated using a custom evaporation-condensation apparatus (Sinclair and La Mer, 1949;  
 77 Krechmer et al., 2017)(Sinclair and La Mer, 1949), and flowed into a 20 m<sup>3</sup> Teflon chamber. To start, we scanned  
 78 with both SMPSs set to a 2 minute scan time with a 15 second retrace time, and a flow rate of 0.3 l min<sup>-1</sup>. This is  
 79 typically how we run our SMPSs for laboratory studies and we have compared with even longer scans (up to 300 s,  
 80 same flow settings) showing good agreement (Liu et al., 2019) and has shown good quantitative agreement for  
 81 intercomparisons during chamber and field campaigns. Those “long scans” serve as a reference. Both SMPSs were  
 82 run concurrently.

83 Some researchers show peak smearing when using faster scan times (although, those studies seem to use a  
 84 sample flow rate=0.3 l min<sup>-1</sup>) (Russell et al., 1995). These studies posit that the smearing is mainly due to instrument  
 85 specific/plumbing delay times from the output of the DMA to the optical detection by the CPC (Russell et al., 1995).  
 86 In Fig. S4b, the number distribution is shown for the different flow/scan time configurations for the SMPS A. The  
 87 black distribution for all scans is the reference (120 scan, 0.3 l min<sup>-1</sup>, resolution=10). For the number distribution,

88 the peak width for the reference is more narrow than for all other configurations. The difference is minor, however,  
89 and not as large as in other reports.

90 In Fig. S4c, the volume distributions are compared. The reference scan has a lower maximum concentration  
91 than the other configurations, which seems to go against previously published results. Over time, [DOS] measured  
92 by the AMS decreases, due to chamber wall loss effects. To counter this, reference scans (120 scans,  $0.3 \text{ l min}^{-1}$   
93 flows) are carried out throughout the experiment. For reference, the SMPSs were run with 30s scans and  $1.5 \text{ l min}^{-1}$   
94 sample flows for the HPLC method proposed in the main text.

95 The distributions for SMPS B are more affected by the different configurations. This is unsurprising, as it  
96 has a longer  $t_d$  than SMPS A (table S3), and likely is more representative of the systems studied in the research cited  
97 above. In Fig. S4d, the number distribution for the reference scan has a higher maxima than the other scans. The  
98 faster, high flow scan is the most different from the reference, and has both a lower maxima and a wider peak width  
99 (resolution = 4). This matches previous findings (Collins et al., 2002), but this study shows a far less dramatic peak  
100 shape difference than that shown therein. This finding could introduce some quantification error. In Fig. S4, the  
101 volume distributions match fairly well for all configurations. A faster instrument (such as an optical particle counter)  
102 would be ideal to obtain faster measurements, but the small diameter particles produced by the Collision atomizer  
103 makes running those instruments impractical and prone to error (due to low detection efficiency at smaller size  
104 particles).

105 For the multi-instrumental calibration experiments, SMPS A and SMPS B were offset by twenty seconds.  
106 That allowed us to obtain a volume concentration every approx. 20 seconds. For comparing the response between  
107 the two SMPSs, an experiment was done where SMPS A and SMPS B were run concurrently (Fig. S5). SMPS A  
108 and SMPS B are shown to match within ~0%-10% (at the maxima). The consistency observed in Fig. S5 between  
109 SMPS A and SMPS B provides increased confidence in the use of each instrument in “fast” mode.

110

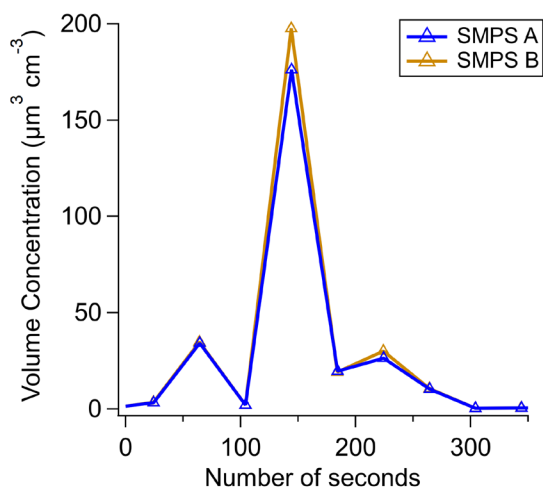

111

112 **Figure S5. Concurrent SMPS scans for an HPLC run**



113 **S2.2 SMPS delay time calculations**

114 Delay times from the aerosol sampling manifold to the DMAs were calculated by running each DMA to size select  
115 particles with a mobility diameter of 115 nm. Following transmission, the time it takes for the CPC concentration to  
116 reach half of its maximum concentration ( $t_{1/2}$ ) was calculated (table S3). Here, delay times were short, due to the  
117 high sample flow. This does not eliminate the importance of having accurate delay times. Fast scans are often prone  
118 to more error than their slow counterparts.

119 To calculate  $t_d$  (table S3), polystyrene latex spheres (PSLs) of a known diameter were atomized and  
120 measured by the SMPSs. Calculating delay times ( $t_{1/2}$  and  $t_d$  [delay time from exit of the DMA to the CPC]) allowed  
121 us to properly align the slower SMPS measurements with the fast mass spectrometer measurements during the  
122 relatively short chromatographically-separated compound peaks. Each eluting HPLC peak is only approx. 1.5  
123 minutes long, and the instruments are run at different time resolutions. Each SMPS collects one data point every 40  
124 seconds. For each data point, the SMPS software provided an uncorrected scanning start time. During the 40-second  
125 scan, concentrations can change significantly. If the SMPS scan starts 15 seconds before the maxima is reached,  
126 then the scan is recording concentrations at particle diameters both before, during, and after the peak maxima. If the  
127 SMPSs were not corrected for their delay times, then the SMPS data point would show an erroneously low/high  
128 concentration, and lead to errors when comparing to the other instruments.

129 **Table S3. Delay times for each SMPS.  $t_{1/2}$  is the time it takes for the CPC concentration to reach half of its maximum**  
130 **concentration**

| SMPS name | CPC type | Delay time ( $t_{1/2}$ ) (s) | DMA -> CPC delay time ( $t_d$ ) (s) |
|-----------|----------|------------------------------|-------------------------------------|
| SMPS A    | 3776     | 10.5                         | 0.43                                |
| SMPS B    | 3775     | 8                            | 1.55                                |

131

132 **S3 Standard mixture mass spectra comparison for direct and multi-instrumental calibrations factors**

133 Mass spectra were obtained from PMF for many of the standards used in Sect. 3.2 and compared against the average  
 134 mass spectra from direct calibrations (Fig. S6).

135

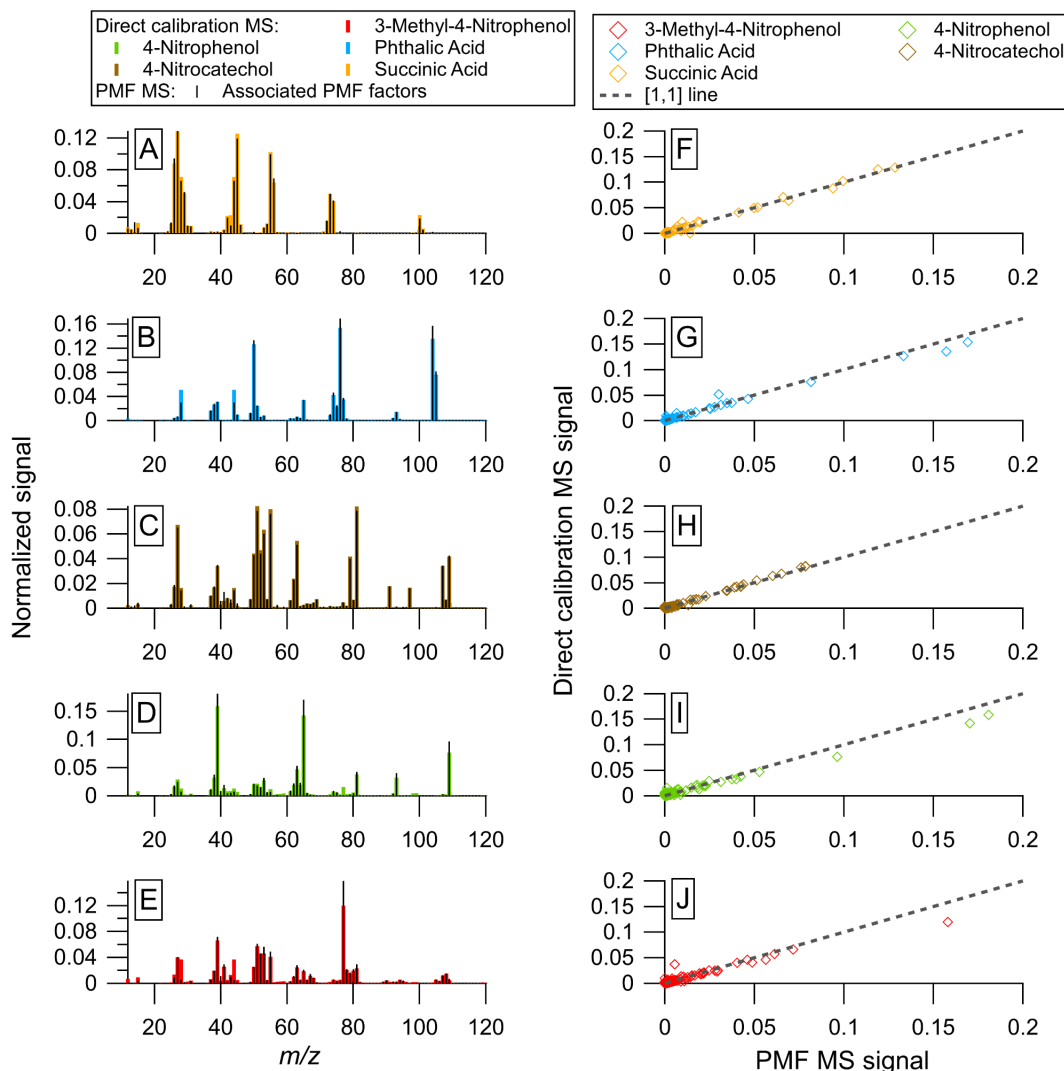

136

137 **Figure S6. (A)-(E) Mass spectra for monodisperse calibrations and associated PMF factors for species directly calibrated.**

138 **(F)-(J) scatter plot of MS signal at each measured  $m/z$  for the direct calibrations vs the PMF mass spectra.**

139

140 The uncentered correlation coefficients (table S4) match well between the assigned PMF factor mass spectra and the  
 141 corresponding direct calibration mass spectra.

142

143 **Table S4. Uncentered correlation coefficient (UC) between AMS direct calibration and PMF factor mass spectra (Ulbrich**  
 144 **et al., 2009)**

|                        | <b>Direct calibration MS</b> |               |               |             |                        |
|------------------------|------------------------------|---------------|---------------|-------------|------------------------|
| <b>PMF factor MS</b>   | Succinic Acid                | Nitrocatechol | Phthalic Acid | Nitrophenol | 3-methyl-4-nitrophenol |
| Succinic Acid          | <b>0.99</b>                  | 0.38          | 0.14          | 0.15        | 0.30                   |
| Nitrocatechol          | 0.38                         | <b>1.0</b>    | 0.23          | 0.49        | 0.62                   |
| Phthalic Acid          | 0.094                        | 0.20          | <b>0.99</b>   | 0.24        | 0.31                   |
| Nitrophenol            | 0.10                         | 0.43          | 0.24          | <b>0.99</b> | 0.45                   |
| 3-methyl-4-nitrophenol | 0.21                         | 0.58          | 0.27          | 0.49        | <b>0.96</b>            |

145

146 The UC provides the same information as the dot product, without the need to normalize the mass spectra. For all  
 147 species, the UC>0.95. For nitrocatechol, the UC rounded up to 1.0 (near perfect agreement).

148 Similarly to the process carried out above, the mass spectra from the PMF solution for the data shown in  
 149 Fig. 6 was compared to direct calibrations (Fig. S7).

150

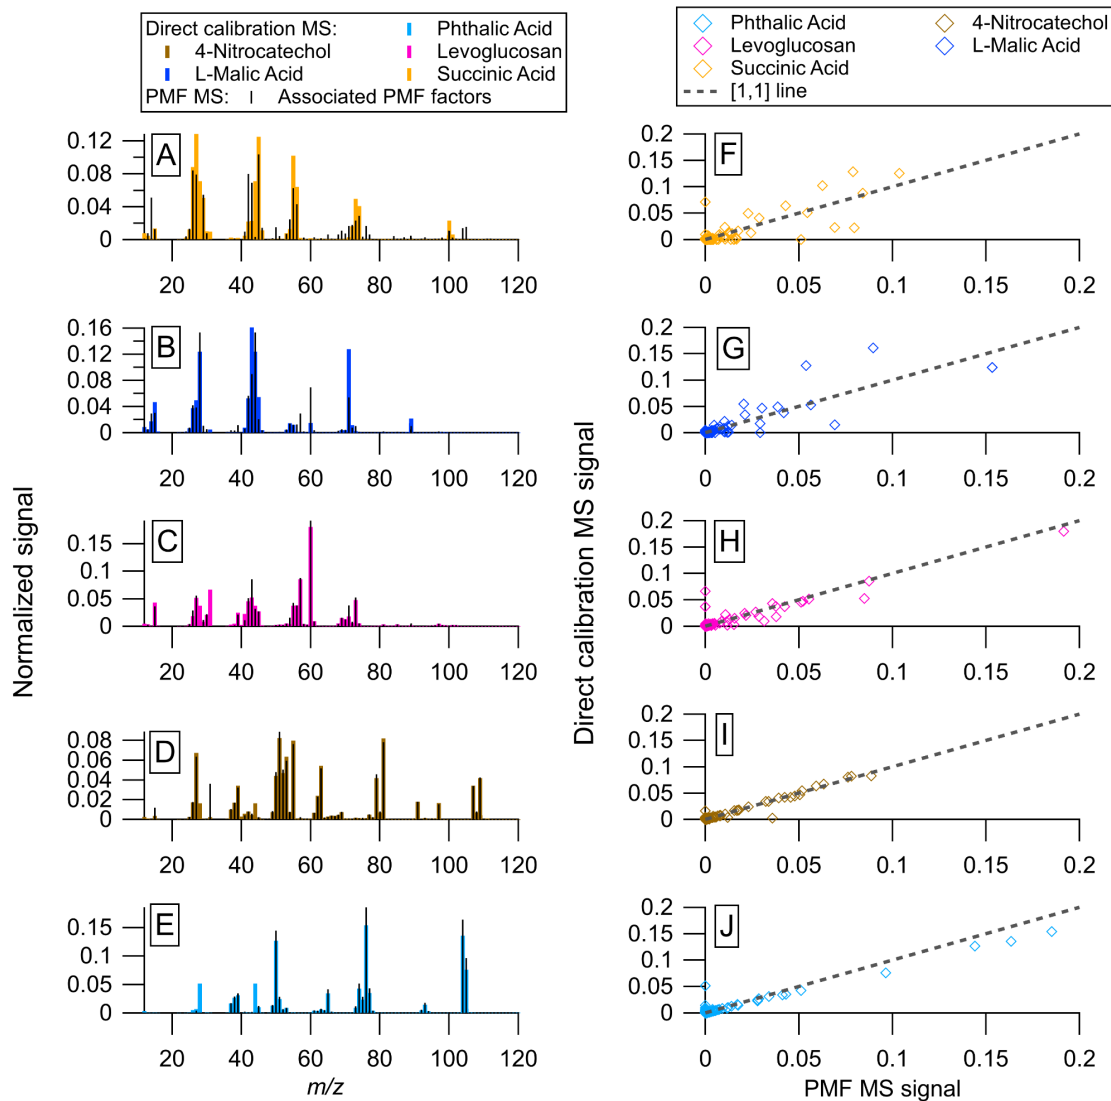

151

152 **Figure S7. (A)-(E) Mass spectra for monodisperse calibrations and associated PMF factors for species directly calibrated**  
 153 **for the second standard solution (Fig. 6). (F)-(J) scatter plot of MS signal at each measured  $m/z$  for the direct calibrations**  
 154 **vs the PMF mass spectra.**

155

156 Uncentered correlation coefficients were also calculated (table S5) and generally showed less agreement than those  
 157 shown in table S4.

158 Table S5. Uncentered correlation coefficient (UC) between AMS direct calibration and PMF factor mass spectra (Ulbrich  
 159 et al., 2009) for standard solution 2 (Fig. 6, Fig. S7)

|                   | Direct calibration MS |             |              |               |               |
|-------------------|-----------------------|-------------|--------------|---------------|---------------|
| PMF factor MS     | Succinic Acid         | Malic Acid  | Levogluconan | Nitrocatechol | Phthalic Acid |
| Succinic Acid PMF | <b>0.81</b>           | 0.50        | 0.35         | 0.31          | 0.17          |
| Malic Acid PMF    | 0.55                  | <b>0.89</b> | 0.60         | 0.20          | 0.23          |
| Levogluconan PMF  | 0.36                  | 0.41        | <b>0.93</b>  | 0.19          | 0.029         |
| Nitrocatechol PMF | 0.33                  | 0.12        | 0.23         | <b>0.98</b>   | 0.20          |
| Phthalic Acid PMF | 0.030                 | 0.014       | 0.025        | 0.19          | <b>0.96</b>   |

160

161 Levogluconan, nitrocatechol, and phthalic acid match well (UC>0.9). Succinic acid and malic acid match less well,  
 162 but still have a UC>0.8. As expected, the UC's for the second standard solution are less good than those for the first  
 163 standard solution (which was almost entirely resolved even without PMF).

164 **S4  $\beta$ -pinene detailed information: density, molecular identification, PMF solution, and peak fitting**

165 For the SOA samples, the effective density was calculated as described in Sect. 2.5.2, shown in Fig. S8.

166

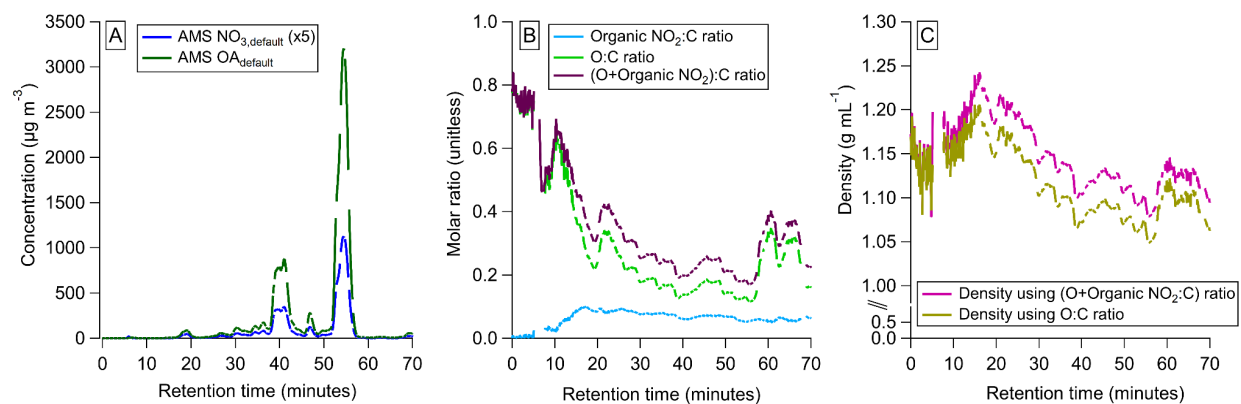

167

168 **Figure S8. (A) Measured  $\text{NO}_3$  and OA from the AMS when sampling  $\beta$ -pinene+ $\text{NO}_3$  SOA. (B) Atomic ratios for organic**  
169 **nitrate:carbon, oxygen to carbon, and oxygen+organonitrates to carbon. (C) Estimated density from two approaches.**

170

171 The chromatogram from Clafflin and Ziemann (2018) was compared to that measured here (Fig. 7), shown below in  
172 Fig. S9.

173

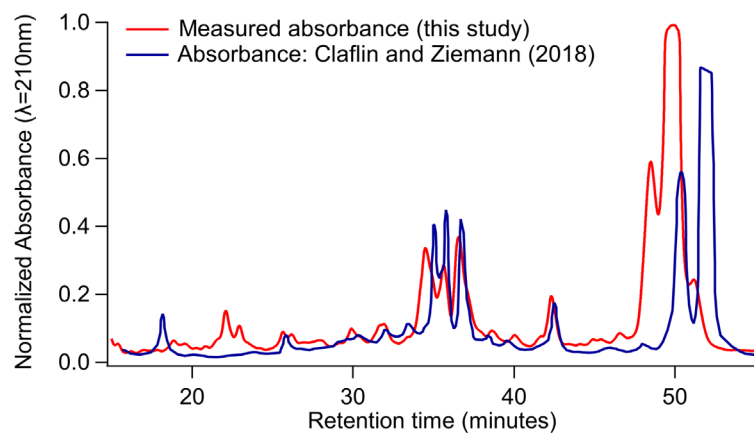

174

175 **Figure S9. Comparison to  $\beta$ -pinene chromatogram measured in Clafflin and Ziemann (2018).**

176

177 The chromatograms show the same general shape, although with slightly faster elution for this work. There are some  
178 notable differences in the results between 20-30 minutes and 45-55 minutes. The final peak in the chromatogram

179 from Claflin and Ziemann is the same peak as the largest one measured here (retention time ~50 minutes). This  
 180 suggests that there could be some difference in the HPLC gradient method, or a potential contamination in one of  
 181 the HPLC solvents. Despite that, the overall signals are consistent, and some of the identified species are shown in  
 182 table S6.

183

184 **Table S6. Structure of known species (from Claflin and Ziemann (2018)), exact (theoretical) mass, observed mass**  
 185 **(measured with EESI+), and mass accuracy (based on EESI instrument multi-ion  $m/z$  calibration fit).**

|                                     |                                                                                   |                                                                                   |                                                                                    |                                                                                     |                                                                                     |
|-------------------------------------|-----------------------------------------------------------------------------------|-----------------------------------------------------------------------------------|------------------------------------------------------------------------------------|-------------------------------------------------------------------------------------|-------------------------------------------------------------------------------------|
| <b>Structure</b>                    | 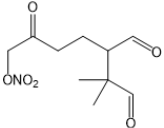 |  |  |  |  |
| MW                                  | 245.23                                                                            | 460.48                                                                            | 444.48                                                                             | 460.48                                                                              | 428.48                                                                              |
| Exact mass (+Na <sup>+</sup> ) (Da) | 268.0797                                                                          | 483.1955                                                                          | 467.2002                                                                           | 483.1955                                                                            | 451.2056                                                                            |
| Detected mass (Da)                  | 268.0879                                                                          | 483.1885                                                                          | 467.2032                                                                           | 483.1885                                                                            | 451.2120                                                                            |
| Mass Accuracy (ppm)                 | 30.6                                                                              | -14.5                                                                             | 6.42                                                                               | -14.5                                                                               | 14.2                                                                                |

186

187

188 PMF was run on the AMS data, shown below for the entire HPLC run (Fig. S10).

189

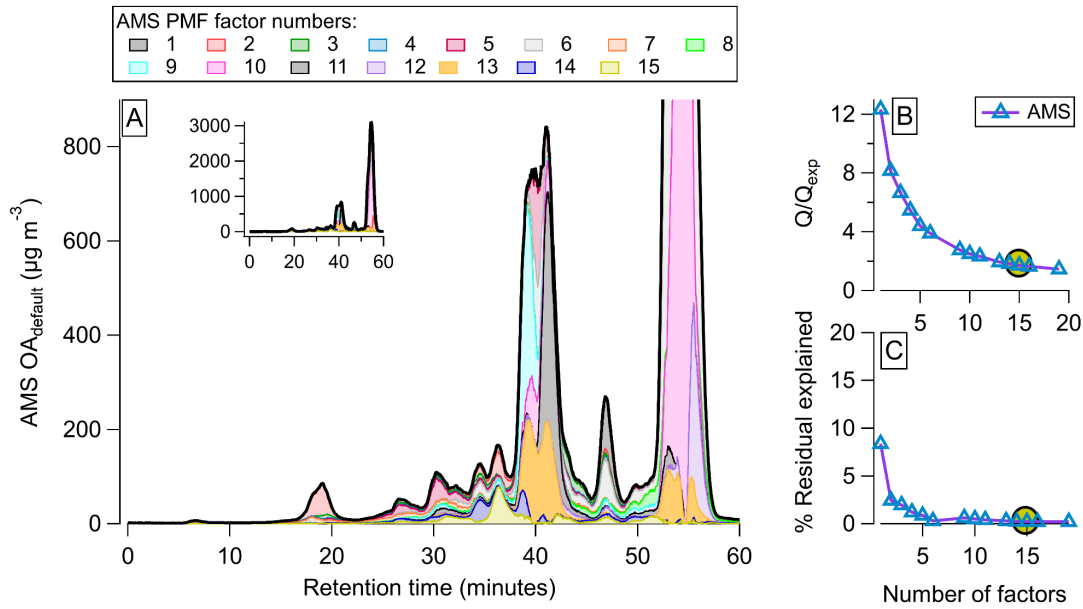

190

191 **Figure S10. (A) stacked plot showing AMS PMF solution time series for the  $\beta$ -pinene/NO<sub>3</sub> SOA system, with inset showing**  
 192 **full scale. (B)  $Q/Q_{\text{expected}}$ , with the chosen solution (15 factors) circled. (C) Percent of the total sum of the residuals**  
 193 **explained, 15 factor solution circled.**

194

195 A 15 factor solution was chosen. The time series and mass spectra for each factor are shown in Fig. S11.

196



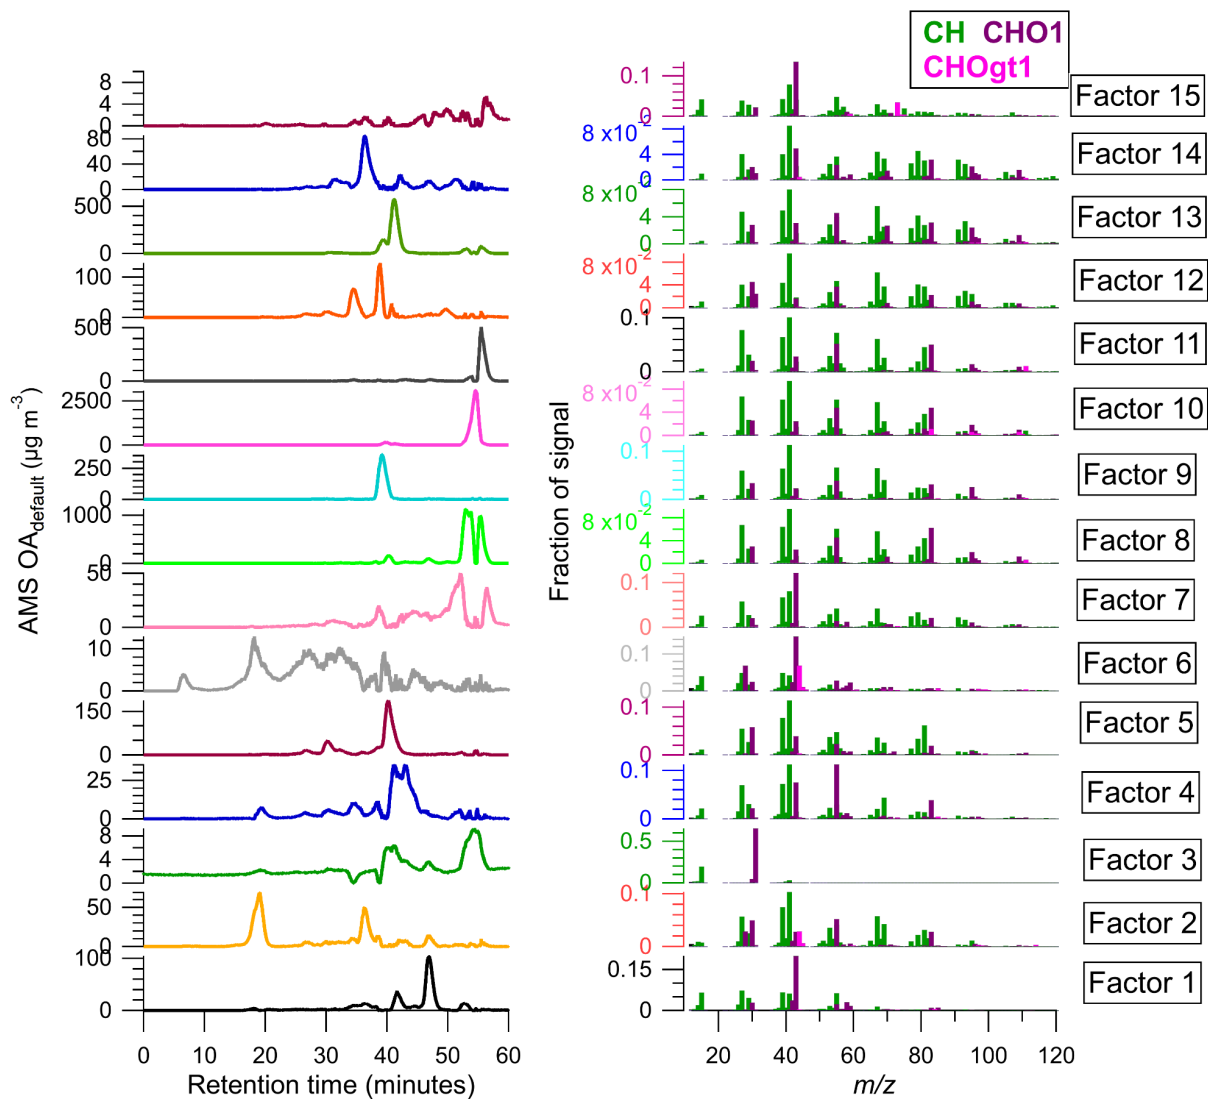

197  
 198 **Figure S11. (Left) time series of individual PMF factors for the  $\beta$ -pinene + NO<sub>3</sub> SOA system and (right) HR mass spectra**  
 199 **(colored by family) for each factor.**

200  
 201 Many of the factors have different time series but very similar mass spectra. This suggests that the species fragment  
 202 similarly in the AMS (and likely have similar phase states). The SOA products are mostly hydrocarbons with polar  
 203 moieties (nitrate, carboxylic acids, ketones, and cyclic ethers). Many of the species retained the nonpolar moiety  
 204 from injection to detection (as shown in the CH dominated mass spectra).

205 The peaks eluting from ~35 - ~43 minutes showed the strongest overlap (and also contained many of the  
 206 known  $\beta$ -pinene/NO<sub>3</sub> SOA products). The time series for this portion of the HPLC run is shown in Fig. S12.

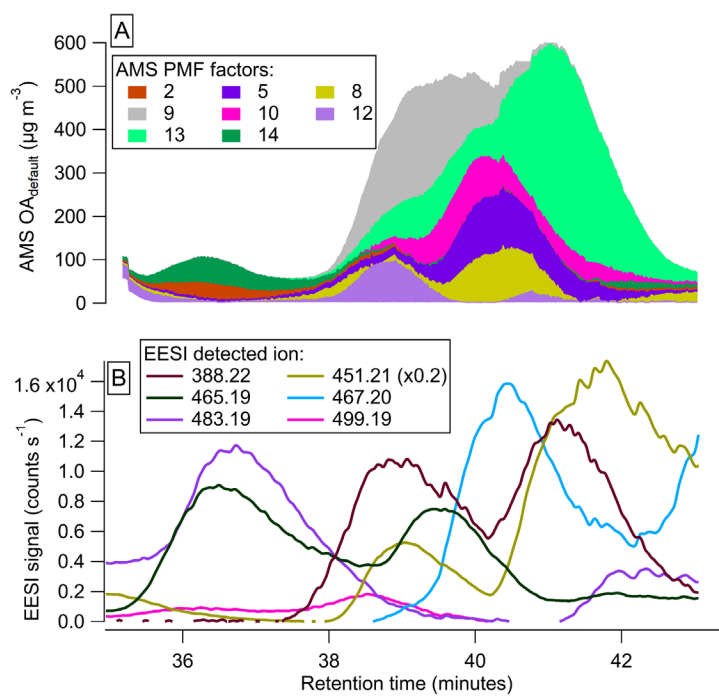

208

209 **Figure S12. (A) stacked plot of AMS PMF factors from 35-43 minutes and (B) EESI HR ions time series.**

210

211 As described in Sect. 3.3, EESI HR ions were matched to AMS PMF factors using the shape of the time series' as  
 212 well as the retention times. Individual peaks are shown in Fig. S13.

213



224 **References**

- 225 Claflin, M. S. and Ziemann, P. J.: Identification and Quantitation of Aerosol Products of the Reaction of  $\beta$ -Pinene  
226 with NO<sub>3</sub> Radicals and Implications for Gas- and Particle-Phase Reaction Mechanisms, *J. Phys. Chem. A*, 122(14),  
227 3640–3652, doi:10.1021/acs.jpca.8b00692, 2018.
- 228 Collins, D. R., Flagan, R. C. and Seinfeld, J. H.: Improved inversion of scanning DMA data, *Aerosol Sci. Technol.*,  
229 36(1), 1–9, doi:10.1080/02786820275339032, 2002.
- 230 DeCarlo, P. F., Dunlea, E. J., Kimmel, J. R., Aiken, A. C., Sueper, D., Crouse, J., Wennberg, P. O., Emmons, L.,  
231 Shinozuka, Y., Clarke, A. and Others: Fast airborne aerosol size and chemistry measurements above Mexico City  
232 and Central Mexico during the MILAGRO campaign, 1foldr Import 2019-10-08 Batch 1 [online] Available from:  
233 <https://oaktrust.library.tamu.edu/bitstream/handle/1969.1/178622/document-2.pdf?sequence=2>, 2008.
- 234 Huffman, J. A., Jayne, J. T., Drewnick, F., Aiken, A. C., Onasch, T., Worsnop, D. R. and Jimenez, J. L.: Design,  
235 Modeling, Optimization, and Experimental Tests of a Particle Beam Width Probe for the Aerodyne Aerosol Mass  
236 Spectrometer, *Aerosol Sci. Technol.*, 39(12), 1143–1163, doi:10.1080/02786820500423782, 2005.
- 237 Jayne, J. T., Leard, D. C., Zhang, X., Davidovits, P., Smith, K. A., Kolb, C. E. and Worsnop, D. R.: Development of  
238 an Aerosol Mass Spectrometer for Size and Composition Analysis of Submicron Particles, *Aerosol Sci. Technol.*,  
239 33(1-2), 49–70, doi:10.1080/027868200410840, 2000.
- 240 Jeong, C.-H. and Evans, G. J.: Inter-Comparison of a Fast Mobility Particle Sizer and a Scanning Mobility Particle  
241 Sizer Incorporating an Ultrafine Water-Based Condensation Particle Counter, *Aerosol Sci. Technol.*, 43(4), 364–  
242 373, doi:10.1080/02786820802662939, 2009.
- 243 Krechmer, J. E., Day, D. A., Ziemann, P. J. and Jimenez, J. L.: Direct Measurements of Gas/Particle Partitioning  
244 and Mass Accommodation Coefficients in Environmental Chambers, *Environ. Sci. Technol.*, 51(20), 11867–11875,  
245 doi:10.1021/acs.est.7b02144, 2017.
- 246 Malloy, Q. G. J., Nakao, S., Qi, L., Austin, R., Stothers, C., Hagino, H. and Cocker, D. R.: Real-Time Aerosol  
247 Density Determination Utilizing a Modified Scanning Mobility Particle Sizer—Aerosol Particle Mass Analyzer  
248 System, *Aerosol Sci. Technol.*, 43(7), 673–678, doi:10.1080/02786820902832960, 2009.
- 249 McMurry, P. H.: A review of atmospheric aerosol measurements, *Atmos. Environ.*, 34(12), 1959–1999,  
250 doi:10.1016/S1352-2310(99)00455-0, 2000.
- 251 Pagonis, D., Campuzano-Jost, P., Guo, H., Day, D. A., Schueneman, M. K., Brown, W. L., Nault, B. A., Stark, H.,  
252 Siemens, K., Laskin, A., Piel, F., Tomsche, L., Wisthaler, A., Coggon, M. M., Gkatzelis, G. I., Halliday, H. S.,  
253 Krechmer, J. E., Moore, R. H., Thomson, D. S., Warneke, C., Wiggins, E. B. and Jimenez, J. L.: Airborne extractive  
254 electrospray mass spectrometry measurements of the chemical composition of organic aerosol, *Atmospheric  
255 Measurement Techniques*, 14(2), 1545–1559, doi:10.5194/amt-14-1545-2021, 2021.
- 256 Russell, L. M., Flagan, R. C. and Seinfeld, J. H.: Asymmetric Instrument Response Resulting from Mixing Effects  
257 in Accelerated DMA-CPC Measurements, *Aerosol Sci. Technol.*, 23(4), 491–509,  
258 doi:10.1080/02786829508965332, 1995.
- 259 Sinclair, D. and La Mer, V. K.: Light scattering as a measure of particle size in aerosols; the production of  
260 monodisperse aerosols, *Chem. Rev.*, 44(2), 245–267, doi:10.1021/cr60138a001, 1949.
- 261 Sioutas, C.: Evaluation of the Measurement Performance of the Scanning Mobility Particle Sizer and Aerodynamic  
262 Particle Sizer, *Aerosol Sci. Technol.*, 30(1), 84–92, doi:10.1080/027868299304903, 1999.

- 263 Ulbrich, I. M., Canagaratna, M. R., Zhang, Q., Worsnop, D. R. and Jimenez, J. L.: Interpretation of organic  
264 components from positive matrix factorization of aerosol mass spectrometric data, *Atmospheric Chemistry &*  
265 *Physics*, 9(9) [online] Available from: <https://d-nb.info/114970523X/34>, 2009.
- 266 Wang, S. C. and Flagan, R. C.: Scanning Electrical Mobility Spectrometer, *Aerosol Sci. Technol.*, 13(2), 230–240,  
267 doi:10.1080/02786829008959441, 1990.
